# Supplementary material
Source: MDPI journal article supplement (https://www.mdpi.com/2073-4344/13/3/554)
Supplement: s1 [file s1]

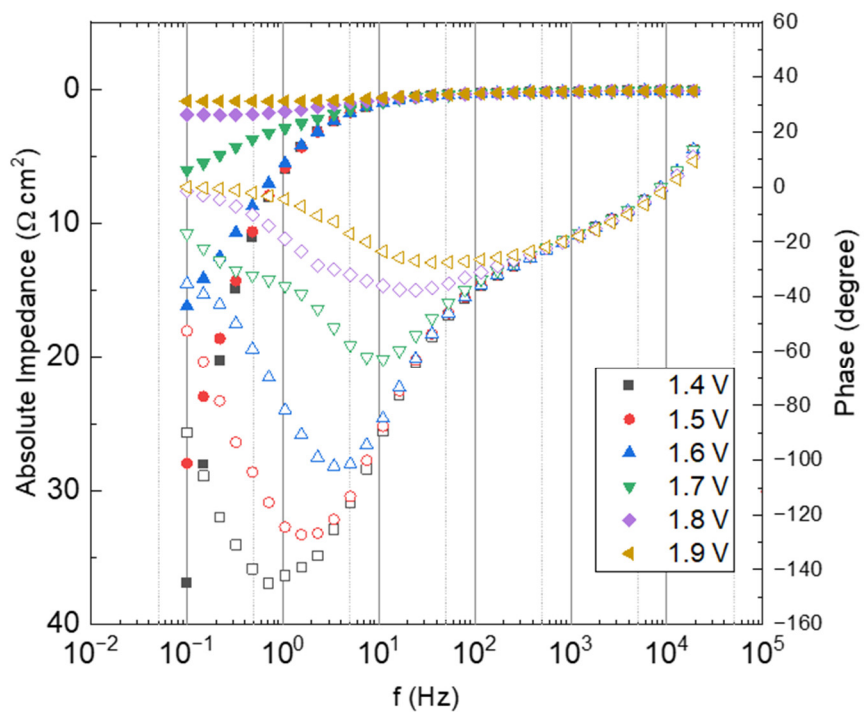

**Figure S1.** The Bode plots of AEM water electrolyzer EIS.

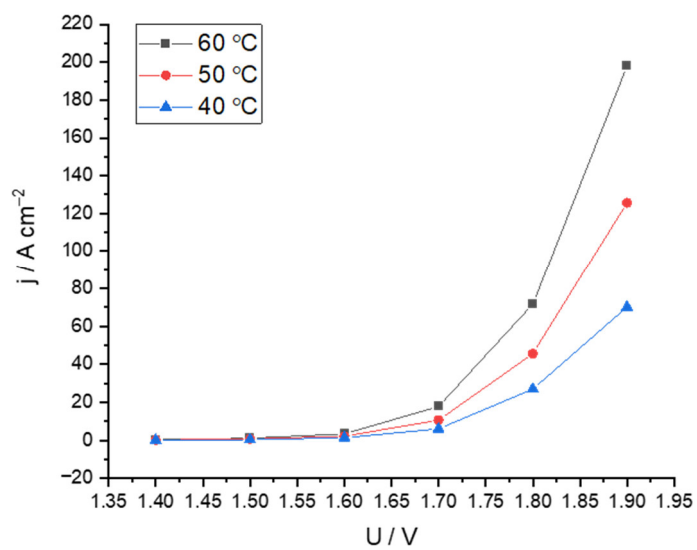

**Figure S2.** Polarization curves plotted with the pre-EIS stabilized currents at different operational conditions.
